# Supplementary material for: Longitudinal Progression of Magnetic Resonance Imaging Markers and Cognition in Dutch-Type Hereditary Cerebral Amyloid Angiopathy
Source: PubMed Central journal article supplement — Stroke. 2022 Apr 1;53(6):2006–15. doi: 10.1161/STROKEAHA.121.035826 (PMC9126261; doi:10.1161/strokeaha.121.035826), 2022-04-01
Supplement: str-53-2006-s001.pdf [file str-53-2006-s001.pdf]

## **SUPPLEMENTAL MATERIAL**

### **Longitudinal progression of MRI markers and cognition in Dutch type hereditary Cerebral Amyloid Angiopathy (D-CAA)**

Suzanne E. van Dijk, MSc<sup>1</sup>; Jeroen van der Grond, PhD<sup>1</sup>; Jessie Lak, MSc<sup>1</sup>; Annette van den Berg-Huysmans, MSc<sup>1</sup>; Gerda Labadie, BSc<sup>1</sup>; Gisela M. Terwindt, MD, PhD<sup>2</sup>; Marieke J.H. Wermer, MD, PhD<sup>2</sup>; M. Edip Gurol, MD<sup>3</sup>; Mark A. van Buchem, MD, PhD<sup>1</sup>; Steven M. Greenberg, MD, PhD<sup>3</sup>; Sanneke van Rooden, PhD<sup>1</sup>

<sup>1</sup> Department of Radiology, Leiden University Medical Center, Leiden, The Netherlands

<sup>2</sup> Department of Neurology, Leiden University Medical Center, Leiden, The Netherlands

<sup>3</sup> Department of Neurology, Massachusetts General Hospital, Boston, U.S.A

Corresponding author:

Suzanne E. van Dijk

Department of Radiology, C3-Q, Leiden University Medical Center

PO Box 9600, 2300 RC Leiden, The Netherlands

Phone: +31-71-5263476

Email: S.E.van\_Dijk.RADI@lumc.nl

Supplementary figure I. Patient flow diagram

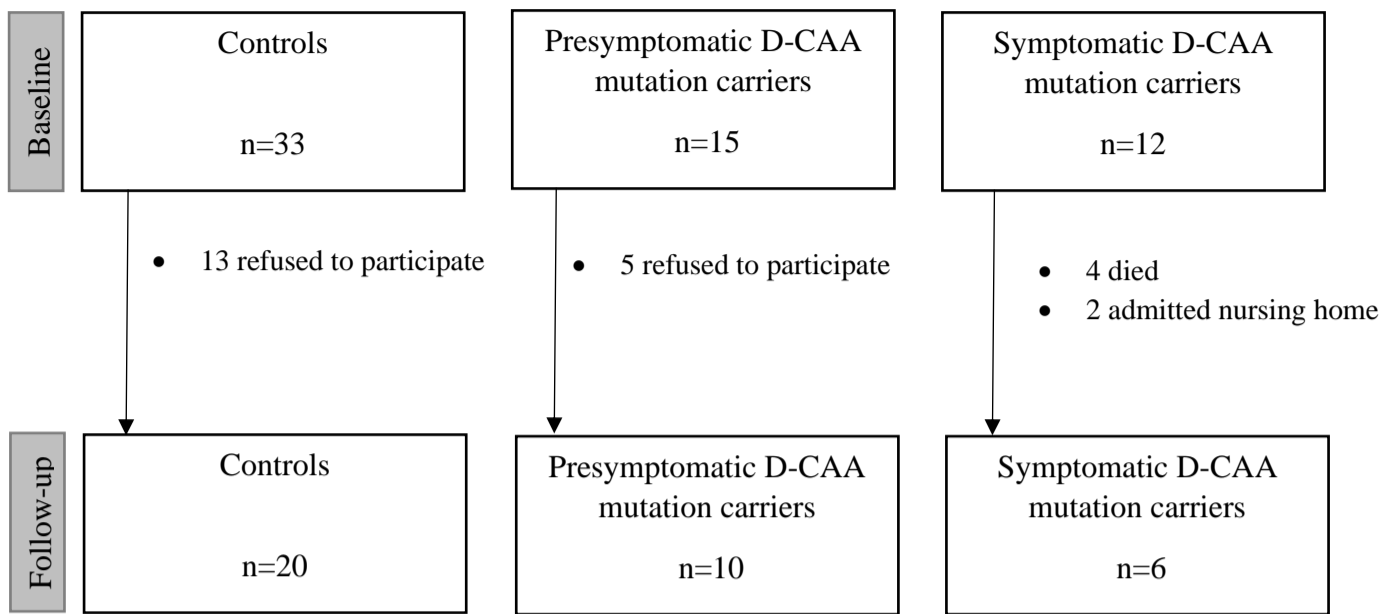

**Supplementary table I. MRI markers at baseline and follow up in healthy controls**

| Controls (n=20)                |                                                  |                               |                         |                               |                         |                                                |
|--------------------------------|--------------------------------------------------|-------------------------------|-------------------------|-------------------------------|-------------------------|------------------------------------------------|
|                                |                                                  | Baseline                      |                         | Follow-up                     |                         | <i>P</i> value<br>Baseline<br>vs follow-<br>up |
|                                |                                                  | Prevalence                    | Mean (SD; range)        | Prevalence                    | Mean (SD; range)        |                                                |
| Hemorrhagic<br>markers         | Microbleeds – Lobair, n                          | 5% (1/20)                     | 0.1 (0.2; 0 - 1)        | 20% (4/20)                    | 0.3 (0.6; 0 - 2)        | 0.104                                          |
|                                | ICHs, n                                          | 0% (0/20)                     | 0 (0; 0 - 0)            | 0% (0/20)                     | 0 (0; 0 - 0)            | –                                              |
|                                | Convexity SAH, n                                 | 0% (0/20)                     | 0 (0; 0 - 0)            | 0% (0/20)                     | 0 (0; 0 - 0)            | –                                              |
|                                | cSS<br>Focal<br>Disseminated                     | 0% (0/20)<br>(0/20)<br>(0/20) | –                       | 0% (0/20)<br>(0/20)<br>(0/20) | –                       | –                                              |
| Non-<br>hemorrhagic<br>markers | WMHs volume (cm3)                                | –                             | 2.5 (3.1; 0.2 - 14.1)   | –                             | 3.8 (5.4; 0.3 - 25.3)   | 0.021                                          |
|                                | DPVS-CSO                                         | –                             | 2.0 (0.8; 1 – 3)        | –                             | 2.3 (0.9; 1 – 4)        | 0.046                                          |
|                                | DPVS-BG                                          | –                             | 1.9 (0.5; 1 – 3)        | –                             | 2.0 (0.5; 1 – 3)        | 0.317                                          |
|                                | Lacunar infarcts, n                              | 30% (6/20)                    | 0.3 (0.5; 0 -1)         | 35% (7/20)                    | 0.4 (0.5; 0 - 1)        | 0.330                                          |
|                                | Fazekas                                          | –                             | 0.9 (0.5; 0.5 – 2.5)    | –                             | 1.0 (0.5; 0.5 – 2.5)    | 0.564                                          |
| SVD in CAA                     | Total SVD in CAA                                 | –                             | 0.4 (0.6; 0 – 2)        | –                             | 0.6 (0.7; 0 – 2)        | 0.083                                          |
| Perfusion                      | CBF frontal lobe (ml/100gr/min)                  | –                             | 39.7 (7.9; 25.4 – 53.8) | –                             | 37.9 (8.9; 21.4 – 52.8) | 0.139                                          |
|                                | CBF occipital lobe (ml/100gr/min)                | –                             | 42.1 (7.2; 25.4 – 56.2) | –                             | 39.1 (7.9; 20.4 – 53.8) | 0.001                                          |
|                                | CBF parietal lobe (ml/100gr/min)                 | –                             | 41.8 (7.6; 27.0 – 56.7) | –                             | 40.2 (8.4; 23.3 – 52.9) | 0.106                                          |
|                                | CBF temporal lobe (ml/100gr/min)                 | –                             | 32.6 (5.2; 22.4 – 42.0) | –                             | 31.6 (5.5; 19.9 – 40.8) | 0.157                                          |
|                                | CBF total cortical gray matter<br>(ml/100gr/min) | –                             | 39.1 (6.9; 25.2 – 52.3) | –                             | 37.3 (7.5; 21.6 – 48.9) | 0.069                                          |

**Supplementary table II. MRI markers at baseline and follow-up in presymptomatic D-CAA mutation**

| Presymptomatic mutation carriers (n=10) |                                                  |                                |                         |                                |                         |                                            |
|-----------------------------------------|--------------------------------------------------|--------------------------------|-------------------------|--------------------------------|-------------------------|--------------------------------------------|
|                                         |                                                  | Baseline                       |                         | Follow-up                      |                         | P value<br>Baseline<br>vs<br>follow-<br>up |
|                                         |                                                  | Prevalence                     | Mean (SD; range)        | Prevalence                     | Mean (SD; range)        |                                            |
| Hemorrhagic<br>markers                  | Microbleeds – Lobair, n                          | 20% (2/10)                     | 3.6 (10.1; 0 - 32)      | 40% (4/10)                     | 10.6 (25.6; 0 - 82)     | 0.191                                      |
|                                         | ICHs, n                                          | 10% (1/10)                     | 0.8 (2.5; 0 - 8)        | 10% (1/10)                     | 2.2 (7.0; 0 - 22)       | 0.343                                      |
|                                         | Convexity SAH, n                                 | 10% (1/10)                     | 0.1 (0.3; 0 - 1)        | 10% (1/10)                     | 0.1 (3.1; 0 - 1)        | –                                          |
|                                         | cSS<br>Focal<br>Disseminated                     | 10% (1/10)<br>(0/10)<br>(1/10) | –                       | 10% (1/10)<br>(0/10)<br>(1/10) | –                       | –                                          |
| Non-hemorrhagic<br>markers              | WMHs volume (cm <sup>3</sup> )                   | –                              | 5.3 (6.0; 1.1 - 21.4)   | –                              | 7.3 (10; 1.3 - 33.1)    | 0.236                                      |
|                                         | DPVS-CSO                                         | –                              | 2.5 (1.3; 1 - 4)        | –                              | 2.7 (1.3; 1 - 4)        | 0.157                                      |
|                                         | DPVS-BG                                          | –                              | 1.8 (0.4; 1 - 2)        | –                              | 1.8 (0.4; 1 - 2)        | –                                          |
|                                         | Lacunar infarcts, n                              | 30% (3/10)                     | 0.5 (0.9; 0 - 2)        | 30% (3/10)                     | 0.5 (0.9; 0 - 2)        | –                                          |
|                                         | Fazekas                                          | –                              | 1.3 (0.7; 0.5 - 2.5)    | –                              | 1.4 (0.8; 0.5 - 3)      | 0.157                                      |
| SVD in CAA                              | Total SVD score in CAA                           | –                              | 1.3 (1.9; 0 - 6)        | –                              | 1.6 (2.2; 0 - 6)        | 0.180                                      |
| Perfusion                               | CBF frontal lobe (ml/100gr/min)                  | –                              | 43.7 (6.1; 33.5 - 56.5) | –                              | 44.5 (6.6; 35.0 - 57.9) | 0.718                                      |
|                                         | CBF occipital lobe (ml/100gr/min)                | –                              | 40.7 (4.8; 31.0 - 48.4) | –                              | 44.2 (7.8; 34.7 - 55.8) | 0.152                                      |
|                                         | CBF parietal lobe (ml/100gr/min)                 | –                              | 44.9 (5.7; 34.1 - 55.9) | –                              | 45.7 (5.4; 37.5 - 54.1) | 0.686                                      |
|                                         | CBF temporal lobe (ml/100gr/min)                 | –                              | 32.0 (4.3; 22.6 - 39.7) | –                              | 33.6 (4.3; 27.2 - 40.8) | 0.243                                      |
|                                         | CBF total cortical gray matter<br>(ml/100gr/min) | –                              | 41.1 (5.1; 31.2 - 51.4) | –                              | 42.4 (5.5; 34.1 - 52.4) | 0.472                                      |

**Supplementary table III. MRI markers at baseline and follow-up in symptomatic D-CAA mutation**

| Symptomatic mutation carriers (n=6) |                                                  |                              |                          |                              |                           |                                     |
|-------------------------------------|--------------------------------------------------|------------------------------|--------------------------|------------------------------|---------------------------|-------------------------------------|
|                                     |                                                  | Baseline                     |                          | Follow-up                    |                           | P value<br>baseline vs<br>follow-up |
|                                     |                                                  | Prevalence                   | Mean (SD; range)         | Prevalence                   | Mean (SD; range)          |                                     |
| Hemorrhagic<br>markers              | Lobar microbleeds, n                             | 100% (6/6)                   | 103 (179.1; 20 - 468)    | 100% (6/6)                   | 155.5 (193.2; 34 - 528)   | 0.064                               |
|                                     | ICHs, n                                          | 100% (6/6)                   | 18.3 (12.0; 7 - 35)      | 100% (6/6)                   | 36.5 (19.8; 6 - 58)       | 0.007                               |
|                                     | Convexity SAH, n                                 | 83.3% (5/6)                  | 2.3 (2.9; 0 - 8)         | 83.3% (5/6)                  | 4.0 (4.3; 0 - 12)         | 0.042                               |
|                                     | cSS<br>Focal<br>Disseminated                     | 100% (5/5)<br>(2/5)<br>(3/5) |                          | 100% (6/6)<br>(0/6)<br>(6/6) |                           | 0.157                               |
| Non-<br>hemorrhagic<br>markers      | WMHs volume (cm3)                                | –                            | 48.7 (24.7; 10.8 - 82.4) | –                            | 67.8 (29.7; 20.3 - 107.1) | 0.061                               |
|                                     | DPVS-CSO                                         | –                            | 4.0 (0.0; 4 - 4)         | –                            | 4.0 (0.0; 4 - 4)          | –                                   |
|                                     | DPVS-BG                                          | –                            | 2.2 (0.4; 2 - 3)         | –                            | 2.3 (0.5; 2 - 3)          | 0.317                               |
|                                     | Lacunar infarcts, n                              | 0% (0/6)                     | 0 (0 - 0)                | 16.7% (1/6)                  | 0.2 (0.4; 0 - 1)          | 0.363                               |
|                                     | Fazekas                                          | –                            | 2.9 (0.2; 2.5 - 3)       | –                            | 3.0 (0.0; 3 - 3)          | 0.317                               |
| SVD in CAA                          | Total SVD score in CAA                           | –                            | 5.6 (0.5; 5 - 6)         | –                            | 6.0; 0.0; 6 - 6)          | 0.157                               |
| Perfusion                           | CBF frontal lobe (ml/100gr/min)                  | –                            | 35.6 (9.8; 18.7 - 42.7)  | –                            | 28.3 (7.9; 17.3 - 36.3)   | 0.025                               |
|                                     | CBF occipital lobe (ml/100gr/min)                | –                            | 33.0 (11.3; 13.3 - 41.4) | –                            | 28.9 (9.7; 11.0 - 35.4)   | 0.101                               |
|                                     | CBF parietal lobe (ml/100gr/min)                 | –                            | 36.7 (12.9; 15.1 - 46.6) | –                            | 28.8 (9.3; 12.3 - 39.7)   | 0.012                               |
|                                     | CBF temporal lobe (ml/100gr/min)                 | –                            | 27.5 (9.2; 11.9 - 35.4)  | –                            | 22.5 (6.3; 12.9 - 29.4)   | 0.053                               |
|                                     | CBF total cortical gray matter<br>(ml/100gr/min) | –                            | 33.9 (10.5; 16.0 - 41.5) | –                            | 27.5 (7.3; 14.7 - 34.6)   | 0.011                               |

**Supplementary table IV. Cognitive and neuropsychiatric function at baseline and follow-up**

| Cognitive/<br>Neuropsychiatric<br>domain | Test/questionnaire               | Controls<br>(n=20)      |                         |                                                   | Presymptomatic mutation carriers<br>(n =10) |                         |                                               | Symptomatic mutation carriers<br>(n=6) |                         |                                               |
|------------------------------------------|----------------------------------|-------------------------|-------------------------|---------------------------------------------------|---------------------------------------------|-------------------------|-----------------------------------------------|----------------------------------------|-------------------------|-----------------------------------------------|
|                                          |                                  | Baseline                | Follow-up               | <i>P</i> value<br>baseline<br>vs<br>follow-<br>up | Baseline                                    | Follow-up               | <i>P</i> value<br>baseline<br>vs<br>follow-up | Baseline                               | Follow-up               | <i>P</i> value<br>baseline<br>vs<br>follow-up |
|                                          |                                  | Mean (SD; range)        | Mean (SD; range)        |                                                   | Mean (SD; range)                            | Mean (SD; range)        |                                               | Mean (SD; range)                       | Mean (SD; range)        |                                               |
| Global cognitive<br>function             | MMSE                             | 29.5 (0.6; 28 - 30)     | 29.5 (0.7; 28-30)       | 0.710                                             | 29.9 (0.3; 29 - 30)                         | 29.5 (0.7; 28 - 30)     | 0.046                                         | 26.7 (5.3; 16 - 30)                    | 25.3 (7.2; 11 - 29)     | 0.109                                         |
| Memory                                   | WMS                              | 125.3 (10.3; 105 - 143) | 131.2 (12.4; 101 - 143) | 0.043                                             | 123.1 (12.1; 103 - 137)                     | 125.1 (12.3; 103 - 143) | 0.525                                         | 121.5 (28.4; 72 - 143)                 | 114.6 (20.9; 92 - 143)  | 0.071                                         |
|                                          | HVLT immediate recall            | 28.5 (4.8; 16 - 35)     | 29.3 (3.3; 24 - 34)     | 0.565                                             | 27.9 (3.0; 24 - 32)                         | 27.6 (4.1; 19 - 31)     | 0.785                                         | 24.5 (9.0; 9 - 31)                     | 21.0 (9.9; 9 - 33)      | 0.315                                         |
|                                          | HVLT delayed recall              | 10.7 (2.6; 6 - 19)      | 9.6 (2.9; 0 - 12)       | 0.130                                             | 10.0 (1.7; 7 - 12)                          | 9.5 (2.4; 5 - 12)       | 0.397                                         | 7.8 (4.1; 0 - 11)                      | 4.3 (5.4; 0 - 11)       | 0.124                                         |
| Psychomotor speed                        | TMT A, sec                       | 31.4 (11.2; 15 - 52)    | 25.6 (10.6; 13 - 51)    | 0.014                                             | 27.1 (9.3; 16 - 44)                         | 24.3 (8.6; 13 - 40)     | 0.317                                         | 49.4 (22.7; 29 - 88)                   | 70.2 (37.1; 26 - 107)   | 0.257                                         |
| Executive function                       | TMT B, sec                       | 59.6 (21.8; 30 - 105)   | 64.7 (39.7; 25 - 159)   | 0.419                                             | 54.9 (14.7; 39 - 85)                        | 51.5 (16.4; 29 - 74)    | 0.258                                         | 132.2 (58.1; 74 - 228)                 | 171.5 (119.2; 65 - 329) | 0.283                                         |
|                                          | DSST                             | 77.5 (16.3; 51 - 110)   | 75.0 (20.4; 38 - 113)   | 0.163                                             | 85.9 (10.6; 70 - 101)                       | 82.2 (13.3; 60 - 104)   | 0.192                                         | 51.2 (13.5; 30 - 63)                   | 42.0 (19.3; 19 - 64)    | 0.061                                         |
|                                          | Clock drawing (median<br>points) | 3.0 (0.2; 2 - 3)        | 3.0 (0.4; 2 - 3)        | 0.317                                             | 3.0 (0.3; 2 - 3)                            | 3.0 (0.0; 3 - 3)        | 0.317                                         | 2.0 (0.5; 2 - 3)                       | 3.0 (0.9; 1 - 3)        | 0.564                                         |
| Language                                 | Letter fluency                   | 33.3 (10.2; 13 - 50)    | 33.2 (11.8; 9 - 48)     | 0.544                                             | 33.1 (11.52; 19 - 54)                       | 30.1 (10.8; 13 - 44)    | 0.175                                         | 27.7 (7.7; 19 - 38)                    | 20.8 (11.1; 7 - 34)     | 0.039                                         |
|                                          | Category fluency                 | 20.5 (4.1; 14 - 29)     | 22.2 (4.0; 15 - 31)     | 0.280                                             | 24.1 (5.9; 14 - 32)                         | 24.7 (4.7; 16 - 30)     | 0.756                                         | 15.2 (6.6; 3 - 21)                     | 12.0 (6.0; 2 - 18)      | 0.087                                         |
|                                          | BNT                              | 28.7 (1.1; 27 - 30)     | 28.7 (1.0; 26 - 30)     | 0.853                                             | 28.2 (1.1; 26 - 30)                         | 27.5 (1.8; 23 - 29)     | 0.209                                         | 25.6 (1.8; 23 - 28)                    | 24.0 (4.4; 19 - 29)     | 0.450                                         |
| Apathy                                   | Apathy scale of Starkstein       | 9.0 (3.9; 2 - 14)       | 7.2 (3.3; 2 - 12)       | 0.024                                             | 7.6 (4.1; 2-17)                             | 5 (2.7; 1 - 11)         | 0.040                                         | 6.5 (3.8; 2-13)                        | 6.0 (2.8; 2 - 10)       | 0.597                                         |
| Anxiety                                  | HADS subscale anxiety            | 3.4 (2.4; 0 - 9)        | 3.2 (3.9; 0 - 14)       | 0.787                                             | 3.8 (2.7; 0 - 9)                            | 3.2 (2.9; 0 - 9)        | 0.595                                         | 5.2 (3.2; 0 - 8)                       | 4.2 (3.0; 1 - 9)        | 0.849                                         |
| Depression                               | HADS subscale depression         | 1.5 (1.6; 0 - 5)        | 1.6 (1.6; 0 - 6)        | 0.685                                             | 0.9 (1.6; 0 - 5)                            | 1.5 (2.6; 0 - 8)        | 0.546                                         | 3.7 (3.3; 0 - 8)                       | 6.4 (3.0; 2 - 9)        | 0.259                                         |
